# Supplementary material
Source: publisher figshare collection journal article supplement (https://sage.figshare.com/ndownloader/files/15964265)
Supplement: Supplementary file 1 [file 15964265]

**Supplementary material**

Correlation between pressure-pain threshold measured using algometry and NRS and MPQ in older adults after hip fracture surgery living in the community (n=50).

| **Pain variables** | **Algometry (N)**  ***r*** | ***P*** |
| --- | --- | --- |
| **NRS** | -0.347 | 0.014 |
| **McGill** |  |  |
| PPI (0-5) | -0.268 | 0.060 |
| NWC (0-20) | -0.638 | <0.001 |
| PRI sensory (0-34) | -0.629 | <0.001 |
| PRI affective (0-17) | -0.520 | <0.001 |
| PRI evaluative (0-5) | -0.583 | <0.001 |
| PRI miscellaneous (0-12) | -0.396 | 0.004 |
| Total (0-68) | -0.623 | <0.001 |

*Spearman’s rho*
